# Supplementary material for: Development and Internal Validation of a New Prognostic Model Powered to Predict 28-Day All-Cause Mortality in ICU COVID-19 Patients—The COVID-SOFA Score
Source: MDPI journal article supplement (doi:10.3390/jcm11144160), 2022-07-18
Supplement: s1 [file s1]

Table S2a. Final Cox PH regression with bias corrected accelerated bootstrapping

| Event = death at 28-days<br>after ICU admission | Stepwise Cox PH regression |         |       |                  | Bias corrected accelerated (BC(a)) bootstrap<br>(resample = 1000 cases) |       |       |                  |
|-------------------------------------------------|----------------------------|---------|-------|------------------|-------------------------------------------------------------------------|-------|-------|------------------|
| Covariate                                       | $\beta$                    | p       | HR    | 95% CI of Exp(b) | $\beta$                                                                 | Bias  | p     | 95% CI for BC(a) |
| Age                                             | 0.037                      | < 0.001 | 1.038 | 1.026 – 1.05     | 0.037                                                                   | 0.001 | 0.001 | 0.025 – 0.052    |
| ln(NLR)                                         | 0.347                      | 0.001   | 1.415 | 1.167 – 1.717    | 0.347                                                                   | 0.002 | 0.002 | 0.181 – 0.597    |
| SOFA ICU admission                              | 0.16                       | < 0.001 | 1.176 | 1.107 – 1.248    | 0.16                                                                    | 0.001 | 0.001 | 0.095 – 0.214    |

The event was coded with 1 and represented death in the time range between ICU admission and 28-days after ICU admission; PH = proportional hazards, BC(a) = bias corrected accelerated;  $\beta$  = regression coefficient; HR = hazard ratio; 95% CI = 95% confidence interval; ln = natural logarithm; NLR = neutrophil-to-lymphocyte ratio; SOFA = Sequential Organ Failure Assessment; ICU = intensive care unit

Table S2b Variables removed from the Cox PH regression model

| Variables not in the Equation |                    | Model if Term Removed |         |                                      |
|-------------------------------|--------------------|-----------------------|---------|--------------------------------------|
|                               |                    | Score                 | p       | Term Removed                         |
| Step 1                        | ln(NLR)            | 22.585                | < 0.001 | Age                                  |
|                               | SOFA ICU admission | 39.029                | < 0.001 |                                      |
|                               | C-reactive protein | 1.062                 | 0.303   |                                      |
|                               | D-dimers           | 0.434                 | 0.510   |                                      |
|                               | Ferritin           | 1.382                 | 0.240   |                                      |
|                               | Gender             | 0.147                 | 0.701   |                                      |
| Step 2                        | ln(NLR)            | 11.814                | 0.001   | Age<br>SOFA ICU admission            |
|                               | C-reactive protein | 0.563                 | 0.453   |                                      |
|                               | D-dimers           | 0.229                 | 0.632   |                                      |
|                               | Ferritin           | 0.261                 | 0.609   |                                      |
|                               | Gender             | 0.045                 | 0.831   |                                      |
|                               |                    |                       |         |                                      |
| Step 3                        | C-reactive protein | 0.016                 | 0.900   | Age<br>ln(NLR)<br>SOFA ICU admission |
|                               | D-dimers           | 0.113                 | 0.737   |                                      |
|                               | Ferritin           | 0.121                 | 0.728   |                                      |
|                               | Gender             | 0.575                 | 0.448   |                                      |
|                               |                    |                       |         |                                      |

Table S2c. Univariate Cox PH regression

| Event = death at 28-days<br>after ICU admission | Univariate Cox PH regression |         |       |                  |
|-------------------------------------------------|------------------------------|---------|-------|------------------|
| Covariate                                       | $\beta$                      | p       | HR    | 95% CI of Exp(b) |
| Age                                             | 0.043                        | < 0.001 | 1.044 | 1.033 – 1.056    |
| ln(NLR)                                         | 0.593                        | 0.001   | 1.809 | 1.504 – 2.176    |
| SOFA ICU admission                              | 0.219                        | < 0.001 | 1.244 | 1.176 – 1.317    |

The event was coded with 1 and represented death in the time range between ICU admission and 28-days after ICU admission; PH = proportional hazards,  $\beta$  = regression coefficient; HR = hazard ratio; 95% CI = 95% confidence interval; ln = natural logarithm; NLR = neutrophil-to-lymphocyte ratio; SOFA = Sequential Organ Failure Assessment; ICU = intensive care unit
