# Supplementary material for: Development and Internal Validation of a New Prognostic Model Powered to Predict 28-Day All-Cause Mortality in ICU COVID-19 Patients—The COVID-SOFA Score
Source: MDPI journal article supplement (doi:10.3390/jcm11144160), 2022-07-18
Supplement: s1 [file s1]

**Table S3a. COVID-SOFA score's goodness-of-fit for 60-day mortality based on the 28-day mortality model**

| 60-day mortality                                                        |                               |
|-------------------------------------------------------------------------|-------------------------------|
|                                                                         | COVID-SOFA<br>ICU admission   |
| Hosmer-Lemeshow Test                                                    | $\chi^2 = 11.45$ , $p = 0.17$ |
| Observed <i>vs.</i> Predicted Mortality Probability                     | 0.58 <i>vs.</i> 0.46          |
| Overall percentage correct                                              | 75.5%                         |
| Akaike Information Criterion (AIC)<br>(value <i>vs.</i> AIC for SOFA)   | 455 <i>vs.</i> 528            |
| Bayesian Information Criterion (BIC)<br>(value <i>vs.</i> BIC for SOFA) | 492 <i>vs.</i> 556            |
| Likelihood ratio test                                                   | $p < 0.01$                    |

COVID-SOFA = coronavirus disease 2019 – sequential organ failure assesment, ICU = intensive care unit

**Table S3b. A comparative analysis of COVID-SOFA score *vs.* SOFA score discriminative ability for 60-day mortality based on the 28-day mortality model**

| 60-day mortality            |                      |                  |                           |                      |                |          |                      |                             |
|-----------------------------|----------------------|------------------|---------------------------|----------------------|----------------|----------|----------------------|-----------------------------|
|                             | C-index<br>95% CI    | C-index<br>diff. | Error rate<br>improvement | AUROC<br>95% CI      | AUROC<br>diff. | p        | AUPRC<br>95% CI      | AURPC diff.<br>95% BC(a) CI |
| COVID-SOFA<br>ICU admission | 0.707<br>0.674-0.739 | 0.061            | 17.23%                    | 0.802<br>0.761-0.839 | 0.102          | < 0.001* | 0.831<br>0.779-0.873 | 0.076<br>0.063-0.09         |
| SOFA<br>ICU admission       | 0.646<br>0.614-0.678 |                  |                           | 0.699<br>0.653-0.743 |                |          | 0.755<br>0.697-0.805 |                             |
| COVID-SOFA<br>48 hours      | 0.747<br>0.716-0.778 | 0.049            | 16.22%                    | 0.872<br>0.837-0.902 | 0.079          | < 0.001* | 0.888<br>0.842-0.922 | 0.084<br>0.068-0.103        |
| SOFA<br>48 hours            | 0.698<br>0.665-0.732 |                  |                           | 0.793<br>0.751-0.831 |                |          | 0.803<br>0.749-0.848 |                             |

\*DeLong (12); COVID-SOFA = coronavirus disease 2019 – sequential organ failure assessment, ICU = intensive care unit, diff. = difference, AUROC = area under the receiver operating characteristic curve, AUPRC = area under the precision-recall curve, 95% CI = 95% confidence interval, BC(a) = bias corrected accelerated bootstrapping
